# Supplementary material for: Ecohydrological responses to solar radiation changes
Source: Copernicus journal article supplement (doi:10.5194/hess-29-381-2025), 2025-01-21
Supplement: Supplementary file 1 [file hess-29-381-2025-supplement.zip]

## Sheet: Sheet1
Number	Location	Latitude	Longitude	Biome Description	First year	Last year	Length Series [yrs]	Mean Precipitation [mm yr^{-1}]	Mean Air Temperature [°C]
1	Vaira ranch (CA, USA)	38.4133	-120.951	C3 Grassland	2000	2013	13.191	552.674	15.6543
2	Walker Branch (TN, USA)	35.9588	-84.2874	Deciduous Forest	1995	2007	12.4298	1425.89	14.7036
3	Reynolds Creek Mountain East (ID, USA)	43.16	-116.46	Shrubs	1983	2008	25.0021	967.353	5.05033
4	San Rossore (IT)	43.71	10.28	Evergreen Forest	2001	2007	6.99521	823.332	15.3018
5	Rietholzbach (CH)	47.36	8.98	C3 Grassland	1976	2014	39.0007	1451.04	7.28711
6	UMBS (MI,USA)	45.5598	-84.7138	Deciduous Forest	1999	2017	18.809	882.813	7.36208
7	Chamau (CH)	47.2102	8.41044	C3 Grassland	2005	2014	9.99863	1135.91	9.48424
8	Früebüel(CH)	47.1158	8.53778	C3 Grassland	2005	2014	9.99863	1628.41	7.63352
9	Lägeren (CH)	47.4781	8.365	Deciduous Forest (Mostly)	2004	2014	11.0007	1175.03	7.76021
10	Oensingen (CH)	47.2858	7.73194	C3 Grassland	2002	2008	7.00068	1222.22	9.27209
11	Bayreuth (DE)	50.15	11.86	Evergreen Forest	1996	1999	3.55647	995.091	6.28315
12	Davos (CH)	46.8153	9.85591	Evergreen Forest	1997	2014	17.9986	1035.3	3.51745
13	Lucky Hills (AZ, USA)	31.7438	-110.052	Mixed Shrubs	1996	2009	13.4702	333.837	17.2447
14	Manaus km34 (BR)	-2.6091	-60.2093	Tropical Forest	1998	2006	7.99452	2736.76	25.8069
15	Santarem km67 (BR)	-2.85667	-54.9589	Tropical Forest	2001	2005	3.99726	1648.68	25.2832
16	Santarem km83 (BR)	-3.01803	-54.9714	Tropical Forest	2000	2004	3.69884	1712.45	25.8863
17	Harvard Forest (MA, USA)	42.5378	-72.1715	Deciduous Forest	1991	2010	19.1786	1178.79	7.87183
18	TasFACE (AUS)	-42.7	147.26	C3/C4 Grassland	2002	2010	8.24367	387.7	11.6765
19	Konza Praire (KS, USA)	39.1	-96.6	C3/C4 Grassland	1982	2013	31.6934	826.141	12.8185
20	Stubai (AT)	47.1162	11.3204	C3 Grassland	2002	2012	11.0007	855.813	6.80541
21	Sevillata shrubland (NM, USA)	34.3349	-106.744	Shrubs and C4 Grassland	2007	2010	4	225.749	14.1234
22	Sevilleta grassland (NM, USA)	34.3623	-106.702	C4 Grassland	2007	2010	4	238.928	13.4241
23	Kendall (AZ, USA)	31.7365	-109.942	C3/C4 Grassland	2004	2013	9.65092	280.02	17.4004
24	Nebraska Sand Hills (NE, USA)	42.0963	-101.407	C3/C4 Grassland	2004	2009	5.99863	419.587	9.00923
25	NevFACE (NV, USA)	36.816	-115.916	C3/C4 Grassland and Shrubs	1997	2007	9.49487	142.083	14.9422
26	ORNL FACE (TN, USA)	35.9	-84.33	Deciduous Forest	1998	2008	11.0007	1220.93	14.8189
27	Duke Forest (NC, USA)	35.96	-79.1	Evergreen Forest (Mostly)	1996	2007	12	1081.26	14.7858
28	Hyytiala (FI)	61.8475	24.295	Evergreen Forest	1997	2012	16	706.676	4.23915
29	Renon (IT)	46.5869	11.4337	Evergreen Forest	1998	2013	16	915.649	4.55009
30	Valles Caldera Mixed Conifer (NM, USA)	35.8884	-106.532	Evergreen Forest	2007	2010	4	741.877	4.49689
31	Fort Peck (MT, USA)	48.3077	-105.102	C3/C4 Grassland	2000	2006	7.00068	376.944	5.73757
32	Jornada Basin (NM, USA)	32.51	-106.78	C3/C4 Grassland and Shrubs	1992	2012	21.0021	249.272	18.1235
33	Tharandt (DE)	50.9636	13.5669	Evergreen Forest	1997	2010	13.9986	863.699	8.75755
34	Scrub Oak (FL, USA)	28.6086	-80.6715	Florida Scrub	2000	2006	7.00068	1171.45	22.0732
35	Morgan Monroe State Forest (IN, USA)	39.3231	-86.4131	Deciduous Forest	1999	2006	8	1067.68	12.322
36	Hainich (DE)	51.0792	10.453	Deciduous Forest	2000	2007	8	806.461	8.30413
37	Chestnut Ridge (TN, USA)	35.9311	-84.3324	Deciduous Forest	2005	2010	5.64271	1265.9	15.4441
38	Niwot Ridge (CO, USA)	40.0329	-105.546	Evergreen Forest	1998	2013	15.1677	716.603	2.23725
39	Blodgett Forest (CA, USA)	38.8952	-120.633	Evergreen Forest	1999	2006	7.6167	1326.28	11.4881
40	Easter Bush (UK)	55.866	-3.2058	C3 Grassland	2004	2010	7.00068	978.016	8.72142
41	Caxiuana (BR)	-1.71833	-51.4667	Tropical Forest	1998	2003	4.99658	2085.94	25.9641
42	Pe de Gigante (BR)	-21.6195	-47.6499	Cerrado	2000	2003	2.99795	1285.36	22.5302
43	Reserva Jaru (BR)	-10.0832	-61.9309	Tropical Forest	1998	2002	3.99726	2321.48	25.1529
44	Northern Old Black Spruce (MB, CA)	55.8796	-98.4808	Evergreen Forest	1994	2008	14.9979	456.284	-1.33846
45	Castelporziano (IT)	41.7052	12.3761	Evergreen Forest (Broadleaves)	2000	2008	9.00205	778.843	15.2549
46	Sodankyla (FI)	67.3619	26.6378	Evergreen Forest	2000	2008	9.00205	547.52	0.929441
47	Le Bray (FR)	44.7171	-0.7693	Evergreen Forest	2001	2008	8	841.494	13.1913
48	Fyodrovskoje (RU)	56.4615	32.9221	Evergreen Forest (Mostly)	1998	2010	12.9993	741.655	5.0791
49	Short Grass Steppe (CO, USA)	40.81	-104.75	C3/C4 Grassland	1986	2009	24	303.839	8.43365
50	Hesse (FR)	48.6742	7.0656	Deciduous Forest	1997	2006	9.99863	936.87	10.1736
51	Willow Creek (WI, USA)	40.806	-90.0798	Deciduous Forest	1999	2014	16	689.121	5.42522
52	Vielsalm (BE)	50.3055	5.9968	Mixed Forest	1997	2006	9.99863	1035.22	8.21101
53	Soroe (DK)	55.4859	11.6446	Deciduous Forest	1997	2006	9.99863	668.456	8.43253
54	Harvard Forest Hemlock Site- Ha2 (MA, USA)	42.5393	-72.1779	Evergreen Forest	2005	2010	5.99863	1322.79	7.97799
55	Little Prospect Hill - LPH (MA, USA)	42.5419	-72.5419	Mixed Forest	2003	2010	8	1302.89	7.81884
56	Puechabon (FR)	43.7414	3.5958	Evergreen Forest (Broadleaves)	2000	2011	11.9973	968.888	13.7617
57	Loobos (NL)	52.1666	5.7436	Evergreen Forest	1997	2006	9.99863	943.088	10.1906
58	Bartlett Forest (NH, USA)	44.0646	-71.2881	Deciduous Forest	2004	2010	7.00068	1253.14	7.47414
59	Howland Main (ME, USA)	45.2041	-68.7402	Evergreen Forest	1997	2004	8	782.032	6.66867
60	Silas Little Experimental Forest (NJ, USA)	39.9138	-74.596	Deciduous Forest (Mostly)	2005	2014	9.99863	1065.26	12.3678
61	Bukit Soeharto (ID)	-0.833333	117.05	Tropical Forest	2001	2002	1.99863	2277.06	26.5084
62	Fazenda Nossa Senhora (BR)	-10.7618	-62.3572	C4 Grassland (Pasture)	1998	2002	3.99726	1691.46	24.8499
63	Amoladeras (ES)	36.8336	-2.25232	C3 Grassland / Shurbs Degraded	2007	2011	4.99932	314.95	18.0108
64	Balsablanca (ES)	36.9406	-2.0329	C3 Grassland / Shurbs	2006	2011	5.58522	301.053	17.5895
65	Dripsey (IE)	51.9867	-8.7518	C3 Grassland	2003	2007	4.75291	1302.6	9.85037
66	Arca di Noe (IT)	40.6061	8.15146	Mediterranean maquis	2004	2009	5.75496	594.643	16.6841
67	Vall d'Alinyà (ES)	42.1522	1.4485	C3 Grassland	2004	2008	5.00205	1042.72	6.233
68	Southern Old Black Spruce (SK, CA)	53.9872	-105.118	Evergreen Forest (Mostly)	1996	2019	22.9979	498.822	1.3743
69	Matra (HU)	47.8469	19.726	C3 Grassland	2004	2008	5.00205	620.23	10.7606
70	El Llano de los Juanes (ES)	36.9266	-2.75211	C3 Grassland (Sparse)	2004	2011	7.66872	588.443	11.9306
71	El Saler (ES)	39.346	-0.3188	Evergreen Forest	1999	2006	8	549.512	17.4073
72	Cedar Bridge (NJ, USA)	39.8379	-74.3791	Mixed Forest	2005	2014	9.50308	1206.99	12.2307
73	Park Falls (WI, USA)	45.9459	-90.2723	Mixed Forest (Mostly Deciduous)	1995	2015	20.9993	693.977	5.56908
74	Las Majadas del Tietar (ES)	39.9415	-5.77336	Savanna - oak woodland	2004	2011	8	705.472	16.1817
75	Metolius Intermediate Pine (OR, USA)	44.4523	-121.557	Evergreen Forest	2002	2012	11.0007	489.9	7.3426
76	Braaschaat (BE)	51.3092	4.5206	Mixed Forest	1996	2013	18.0014	826.924	10.6067
77	Prades (ES)	41.21	0.91	Evergreen Forest (Broadleaves)	1999	2012	13.9986	521.803	11.4304
78	Brandbjerg (DK)	55.89	11.97	C3 Grassland / Shurbs	2005	2013	8.25188	759.163	9.59135
79	Dry River (AU)	-15.2588	132.371	Savanna - Eucalyptos	2000	2019	19.7481	894.808	26.6012
80	Howard Springs (AU)	-12.4952	131.15	Savanna - Eucalyptos	2000	2019	19.7481	1660.85	26.815
81	Adelaide River (AU)	-13.0769	131.118	Savanna - Eucalyptos	2007	2009	3.00068	1359.08	26.9557
82	Sturt Plain (AU)	-17.1508	133.35	C4 Grassland	2000	2019	19.7481	688.659	26.0849
83	Lahav (IL)	31.38	34.9	Shrubs and C3 Grassland	2003	2014	10.6119	255.153	19.0578
84	Matta (IL)	31.71	35.07	Shrubs and C3 Grassland	2003	2014	11.0691	488.872	17.9435
85	Garraf (ES)	41.3	1.82	C3 Grassland	1999	2014	15.3867	566.344	15.0435
86	Stubai Rainfall Exclusion (AT)	47.1162	11.3204	C3 Grassland	2002	2012	11.0007	855.813	6.80541
87	Mongu (ZM)	-15.4378	23.2528	Savanna - Mixed	2000	2009	10.0014	980.042	22.3365
88	Yatir (IL)	31.345	35.0515	Evergreen Forest (Sparse)	2001	2009	8.99932	271.832	18.0797
89	Sardinilla (PA)	9.31378	-79.6314	C4 Grassland (Pasture)	2007	2009	3.00068	2318.37	25.2739
90	Hakasia (RU)	54.7252	90.0022	C3 Grassland	2002	2004	3.00068	383.59	2.0393
91	Daly River Pasture (AU)	-14.1331	131.386	C4 Grassland (Pasture)	2007	2013	7.00068	1372.96	25.4609
92	Daly River Savanna (AU)	-14.1592	131.388	Savanna - Eucalyptos	2000	2019	19.7481	1256.31	26.8269
93	Alice Springs (AU)	-22.283	133.249	Mulga Woodland	2000	2019	19.7481	350.14	22.5326
94	Ti Tree East (AU)	-22.287	133.64	Savanna - Corymbia	2000	2019	19.7481	382.714	22.6431
95	Virasoro (AG)	-28.2395	-56.1886	Evergreen Forest	2009	2012	4	1418.36	21.615
96	Collelongo (IT)	41.8494	13.5881	Deciduous Forest	1996	2014	19.0007	1178.57	7.23549
97	Siziwang Grazed (CN)	41.7902	111.897	C3 Grassland	2010	2012	3.00068	280.611	2.39692
98	Luquillo (PR)	18.2797	-65.7638	Elfin Cloud Forest	2002	2009	8	4007.73	18.696
99	Torgnon (IT)	45.8444	7.5781	C3 Grassland	2008	2014	7.00068	870.894	2.94126
100	Lavarone (IT)	45.9562	11.2813	Evegreen Forest (Mostly)	2000	2014	15.0007	1324.68	7.04328
101	Guyaflux (GU)	5.27877	-52.9249	Tropical Forest	2004	2014	11.0007	3110.3	25.6135
102	Monte Bondone (IT)	46.0147	11.0458	C3 Grassland	2003	2013	11.0007	1268.5	5.20699
103	Wallaby (AU)	-37.428	145.87	Eucalyptos Forest	2000	2018	18.4969	1022.47	10.9073
104	Petrolina (BR)	-9.04655	-40.3213	Caatinga	2011	2018	7.99726	327.032	26.5727
105	Rottenbuch (DE)	47.7299	10.969	C3 Grassland	2012	2018	7.00068	1091.27	8.5297
106	Graswang (DE)	47.5708	11.0326	C3 Grassland	2012	2018	7.00068	1272.63	6.78637
107	Fendt (DE)	47.8329	11.0607	C3 Grassland	2012	2018	7.00068	971.171	8.90392
108	Maqu (CN)	33.9165	102.159	C3 Grassland	2016	2018	2.38193	605.088	3.02262
109	Tumbarumba (AU)	-35.6566	148.152	Eucalyptos Forest	2001	2014	13.9986	963.331	9.52601
110	Dinghushan (CN)	23.1733	112.536	Subtropical evergreen broadleaved	2003	2005	3.00068	1373.23	20.4296
111	Zackenberg Heath (DK)	74.4733	-20.5503	Arctic C3 Grassland	2000	2014	15.0007	160.656	-8.84401
112	Duolun (CN)	42.0467	116.284	C3 Grassland	2006	2008	3.00068	331.471	3.16575
113	Tchizalamou (CG)	-4.28917	11.6564	C4 Grassland (Pasture)	2006	2009	4	1724.68	24.3038
114	Dahra (SN)	15.4028	-15.4322	Savanna - Mixed	2010	2013	4	521.42	28.1574
115	Demokeya (SD)	13.2829	30.4783	Savanna - Mixed	2005	2009	4.99932	295.652	27.3633
