# Supplementary material for: Ecohydrological responses to solar radiation changes
Source: Copernicus journal article supplement (doi:10.5194/hess-29-381-2025), 2025-01-21
Supplement: Supplementary file 2 [file hess-29-381-2025-supplement.zip]

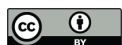

## *Supplement of*

# **Ecohydrological responses to solar radiation changes**

**Yiran Wang et al.**

*Correspondence to:* Yiran Wang (yiranw@u.nus.edu)

- hess-29-381-2025-supplement-title-page.pdf
- Supportingfile.pdf
- TableS2.xlsx

The copyright of individual parts of the supplement might differ from the article licence.
